# Supplementary material for: Transcription factor retention through multiple polyploidization steps in wheat
Source: PubMed Central journal article supplement (PMC9339333; doi:10.1093/g3journal/jkac147), 2022-06-24
Supplement: jkac147_figure_s1.pdf [file jkac147_figure_s1.pdf]

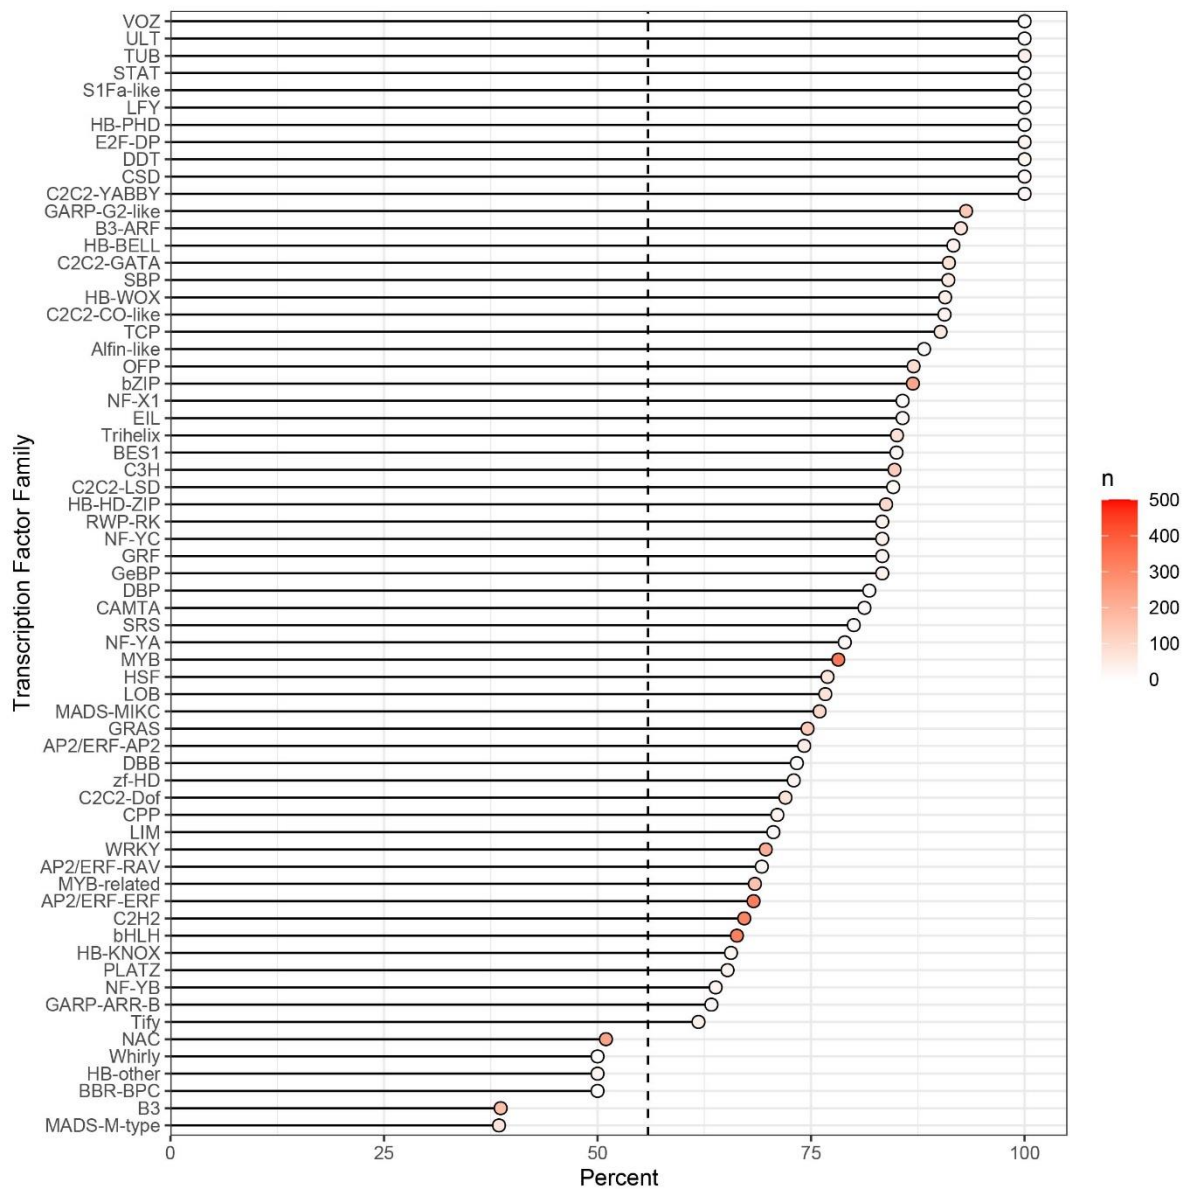

**Figure S1.** Percentage of genes in triads in *T. aestivum* transcription factor (TF) families. The dotted black line indicates the mean value for non-transcription factors. The fill colour of the dots indicates the number of genes in the TF family.
