# Supplementary material for: Transcription factor retention through multiple polyploidization steps in wheat
Source: PubMed Central journal article supplement (PMC9339333; doi:10.1093/g3journal/jkac147), 2022-06-24

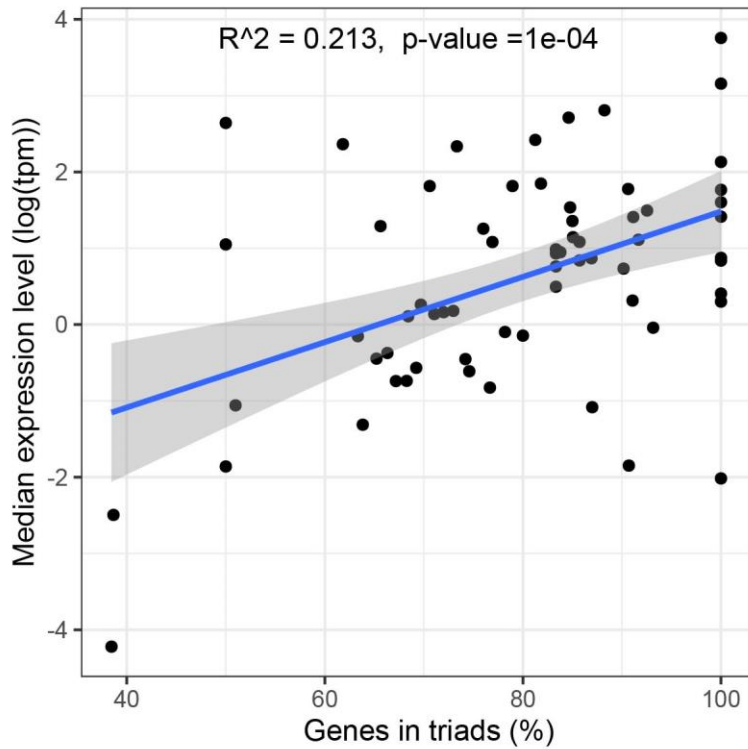

Supplement: jkac147_figure_s3.pdf [file jkac147_figure_s3.pdf]
