# Supplementary material for: Transcription factor retention through multiple polyploidization steps in wheat
Source: PubMed Central journal article supplement (PMC9339333; doi:10.1093/g3journal/jkac147), 2022-06-24
Supplement: jkac147_figure_s4.pdf [file jkac147_figure_s4.pdf]

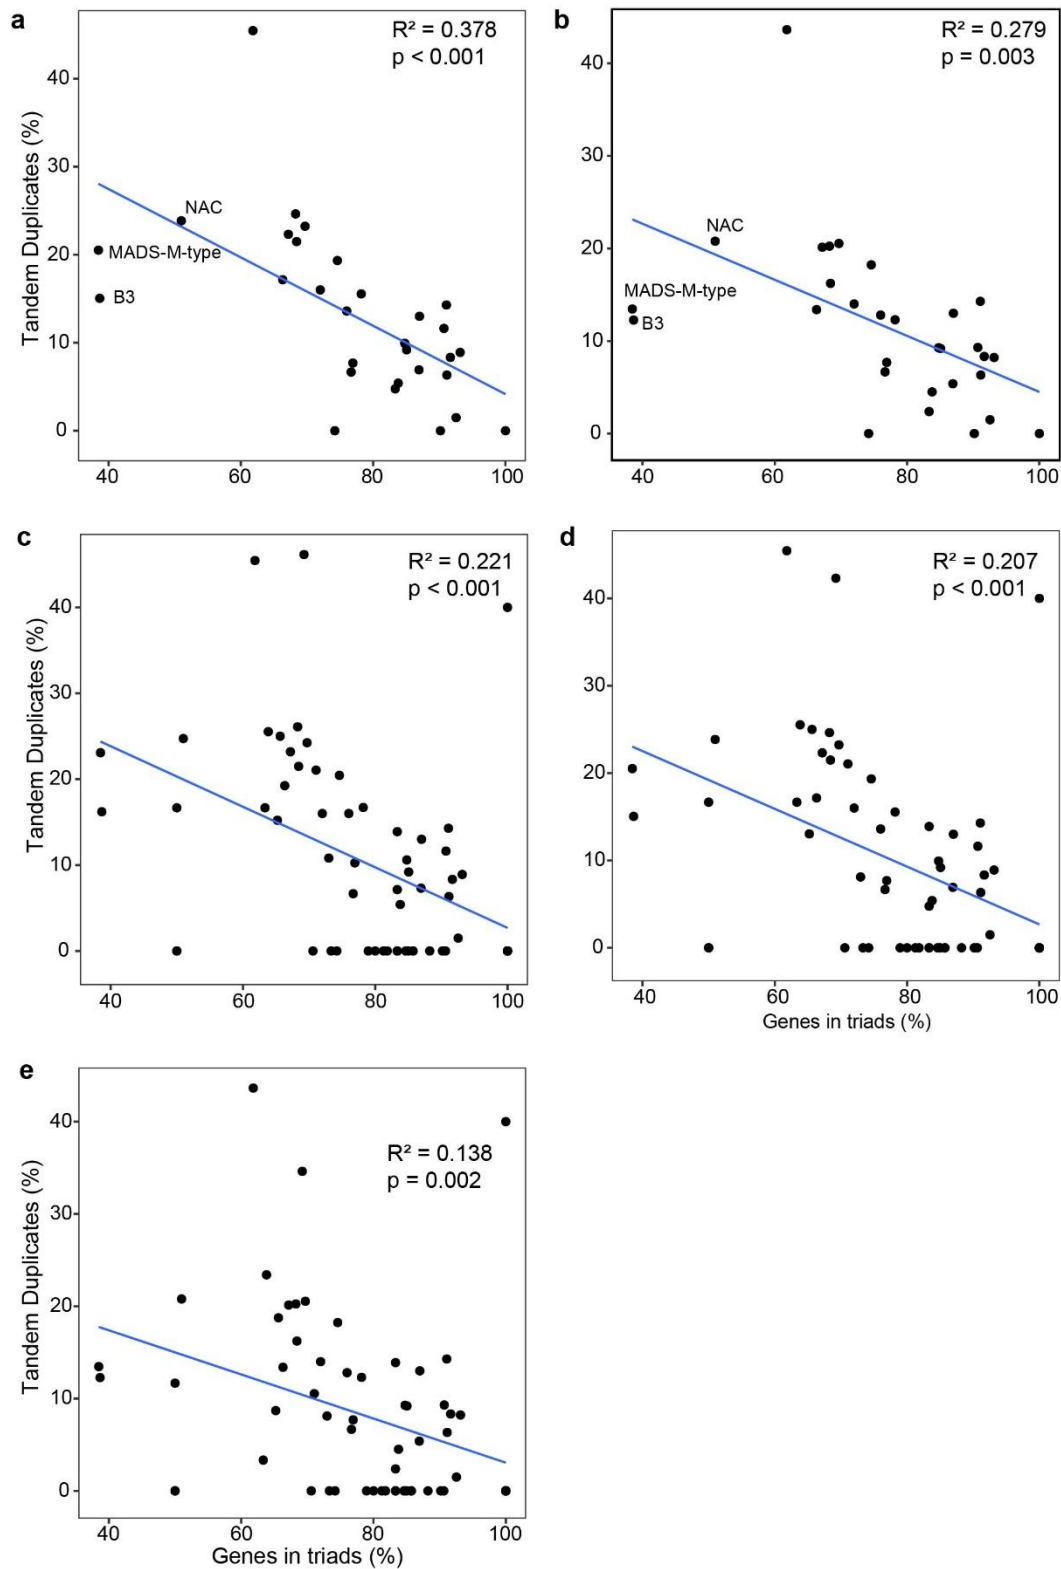

**Figure S4.** Relationship between tandem duplication within each transcription factor (TF) family and percentage of the TF family in triads. a) and b) show TF families with  $>30$  genes in triads. c), d) and e) show all TF families. a) and d) Define tandem duplicates as up to  $\pm 2$  genes away from each other (i.e. with 0 or 1 gene between duplicated TFs). b) and e) Define tandem duplicates as  $\pm 1$  genes away from each other (i.e. with 0 genes between duplicated TFs). c) Defines tandem duplicates as up to  $\pm 3$  genes away from each other (i.e. with 0, 1 or 2 genes between duplicated TFs).
