# Supplementary material for: Transcription factor retention through multiple polyploidization steps in wheat
Source: PubMed Central journal article supplement (PMC9339333; doi:10.1093/g3journal/jkac147), 2022-06-24
Supplement: jkac147_figure_s5.pdf [file jkac147_figure_s5.pdf]

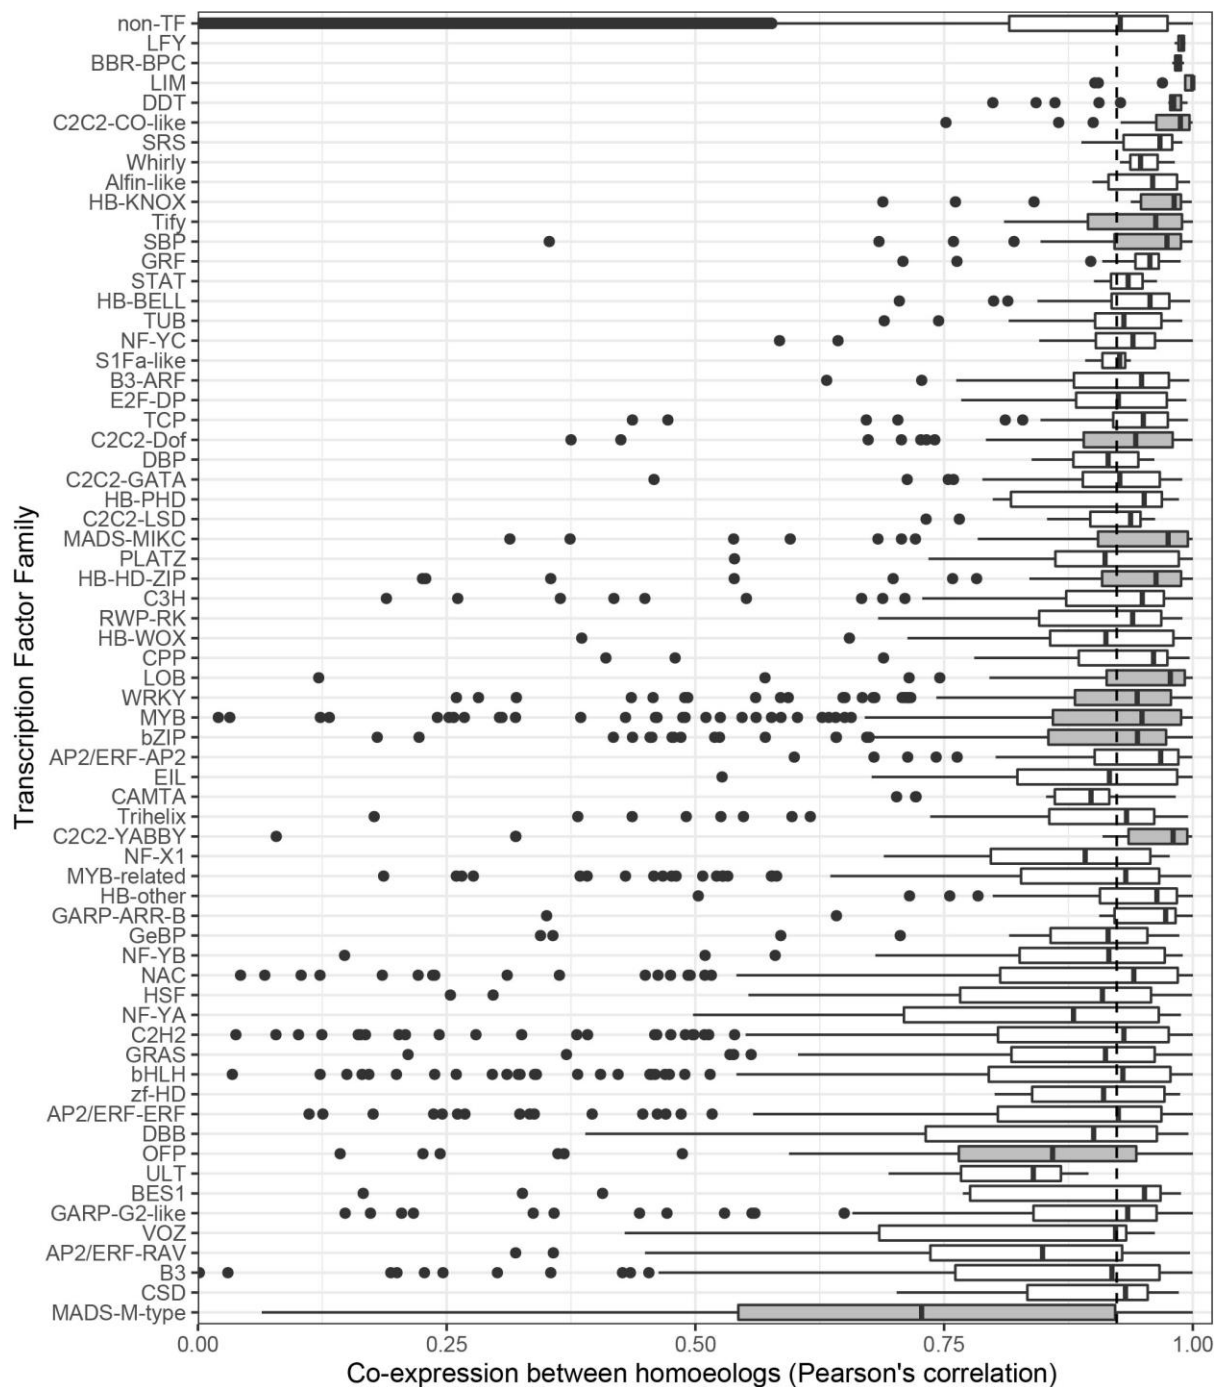

**Figure S5.** Pearson's correlation coefficient between homoeologs across 15 tissues per transcription factor (TF) family. TF families which were significantly different to non-TFs are highlighted in grey (Mann-Whitney test,  $p < 0.05$ , FDR corrected for multiple testing). The correlation between non-TF homoeologs is shown in the top row and the dotted vertical black line represents the median value for non-TFs.
