# Supplementary material for: Transcription factor retention through multiple polyploidization steps in wheat
Source: PubMed Central journal article supplement (PMC9339333; doi:10.1093/g3journal/jkac147), 2022-06-24
Supplement: jkac147_figure_s6.pdf [file jkac147_figure_s6.pdf]

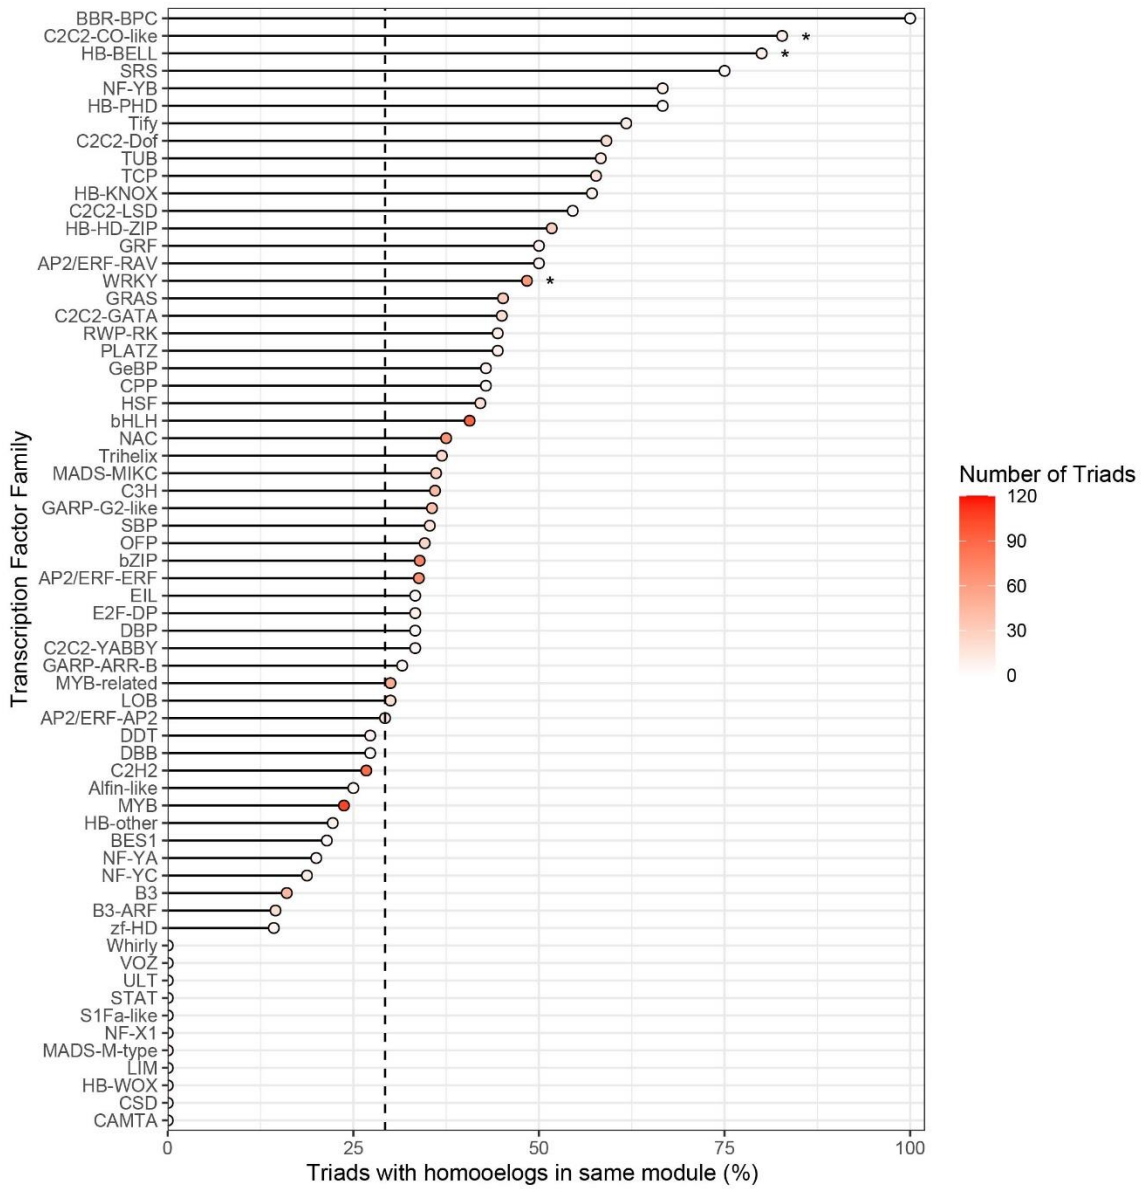

**Figure S6.** Homoeologs in same module in 850 sample WGCNA network per transcription factor (TF) family. Black dotted line represents mean value of non-TFs and asterisks (\*) denote families which are statistically significantly different from non-TFs.
