# Supplementary material for: Transcription factor retention through multiple polyploidization steps in wheat
Source: PubMed Central journal article supplement (PMC9339333; doi:10.1093/g3journal/jkac147), 2022-06-24
Supplement: jkac147_figure_s8.pdf [file jkac147_figure_s8.pdf]

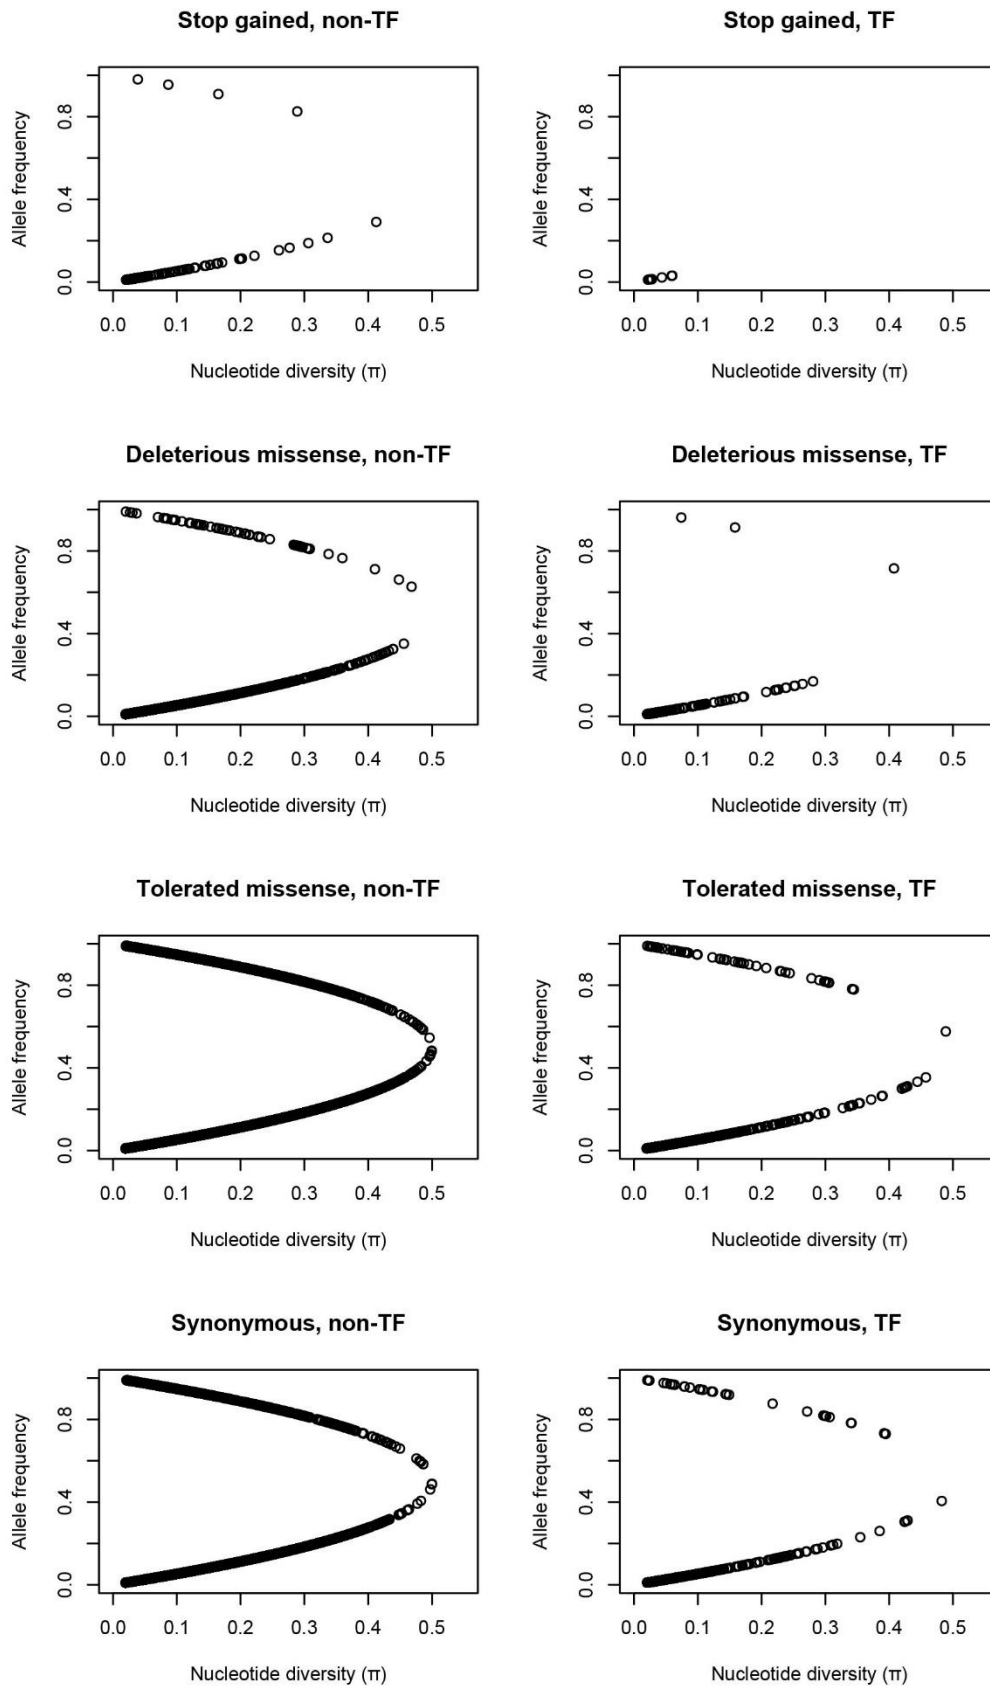

**Figure S8.** Association between per-site nucleotide diversity ( $\pi$ ) and allele frequency for transcription factors (TF) and background genes (non-TF).
